# Supplementary material
Source: PubMed Central journal article supplement (PMC5410992)
Supplement: NIHMS72488-supplement-Supplemental_Materials.pdf [file NIHMS72488-supplement-Supplemental_Materials.pdf]

## Online Supplementary Materials

# Maternal Vitamin D Concentrations During Pregnancy, Fetal Growth

## Patterns and Risks of Adverse Birth Outcomes.

*Running title: Maternal 25(OH)D and fetal outcomes*

Kozeta Miliku, MD<sup>1,2,3</sup>, Anna Vinkhuyzen, PhD<sup>5,6</sup>, Laura M. E. Blanken, MD<sup>1,4</sup>, John J. McGrath, MD, PhD<sup>5,6</sup>, Darryl W. Eyles, PhD<sup>5,6</sup>, Thomas H. Burne, PhD<sup>5,6</sup>, Albert Hofman, MD, PhD<sup>2</sup>, Henning Tiemeier, MD, PhD<sup>2,4</sup>, Eric A.P. Steegers, MD, PhD<sup>7</sup>, Romy Gaillard, PhD<sup>1,2,3</sup>, Vincent W.V. Jaddoe, MD, PhD<sup>\*1,2,3</sup>

\*Corresponding author: V.W.V. Jaddoe, MD, PhD, The Generation R Study Group (Na-2915), Erasmus MC, University Medical Center, PO Box 2040, 3000 CA Rotterdam, The Netherlands; Phone: +31 (0) 10 7043405, Fax: +31 (0) 10 4089382 ; E-mail: v.jaddoe@erasmusmc.nl

**Supplementary Figure 1.** Flowchart of the study participants

**Supplementary Table 1.** Subject characteristics observed and imputed (N = 7098)

**Supplementary Table 2.** Subject characteristics according to quartiles of 25(OH)D (N = 7098)

**Supplementary Table 3.** Associations of maternal second trimester 25(OH)D concentrations with fetal growth patterns from multiple regression models (N = 7098)

**Supplementary Table 4.** Associations of maternal second trimester 25(OH)D concentrations in clinical cut-off groups with fetal growth patterns (N = 7098)

**Supplementary Table 5.** Associations of maternal second trimester 25(OH)D concentrations with fetal growth outcomes among Europeans only (N = 4069)

**Supplementary Figure 2.** Associations of maternal second trimester 25(OH)D concentrations, in cut-off groups with the risks of adverse birth outcomes (N= 7098)

**Supplementary Figure 3.** Associations of maternal second trimester 25(OH) concentrations with the risks of adverse birth outcomes among Europeans only (N = 4069)

**Supplementary Table 6.** Associations of adverse birth outcomes with cord blood 25(OH)D concentrations among Europeans only (N = 2550)

**Supplementary Figure 1. Flowchart of the study participants**

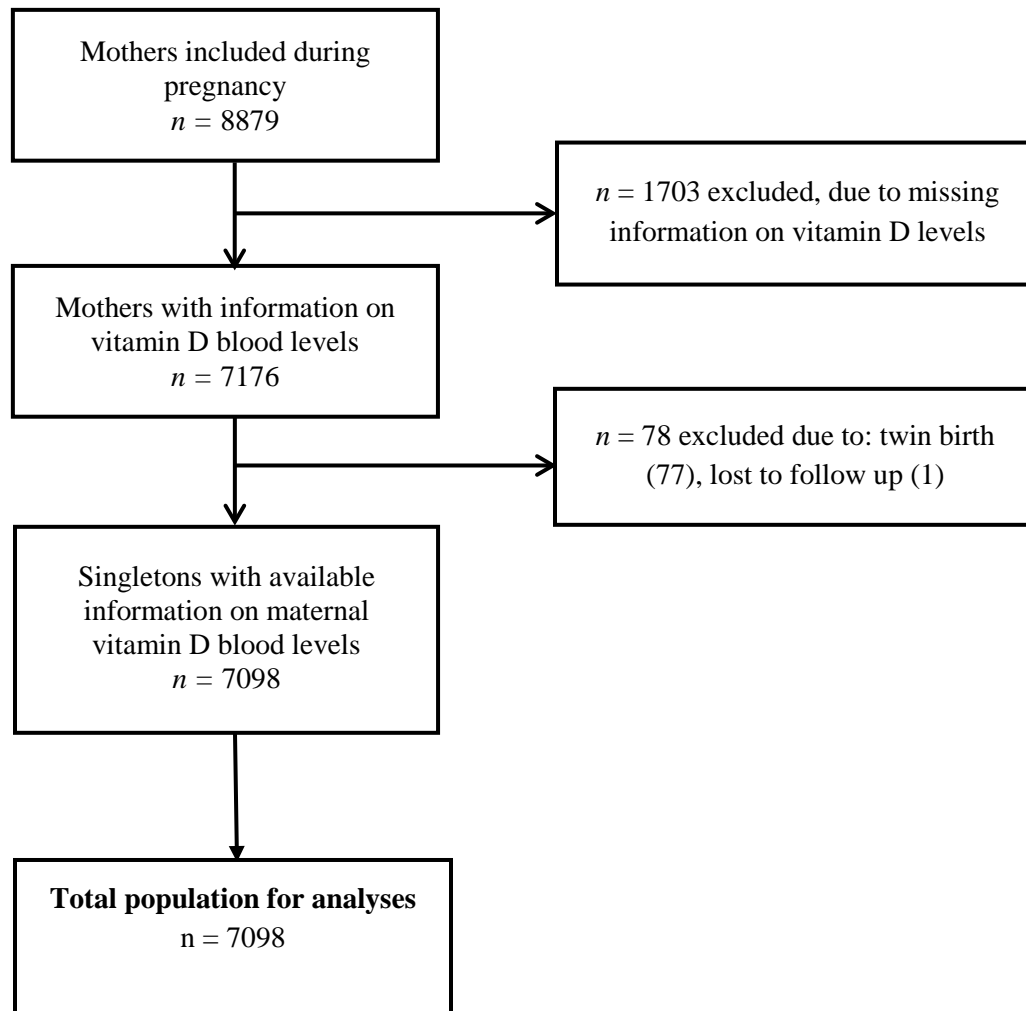

**Supplementary Table 1. Subject characteristics observed and imputed<sup>1</sup>**

|                                                                      | <b>Original</b>    | <b>Imputed</b>    |
|----------------------------------------------------------------------|--------------------|-------------------|
|                                                                      | N = 7098           | N = 7098          |
| <b>Maternal characteristics</b>                                      |                    |                   |
| Age, mean (SD), y                                                    | 29.7 (5.2)         | NI                |
| Body mass index at enrolment, median (95% range) , kg/m <sup>2</sup> | 23.8 (18.7, 36.3)  | 23.7 (18.7, 36.3) |
| <i>Missing, No. (%)</i>                                              | <i>46 (0.6)</i>    |                   |
| Gestational age at enrollment, median (95% range), wk                | 13.9 (9.9, 22.9)   | NI                |
| Nulliparous, No. (%)                                                 | 3955 (55.7)        | 3987 (56.2)       |
| <i>Missing, No. (%)</i>                                              | <i>67 (0.9)</i>    |                   |
| Education level, No. (%)                                             |                    |                   |
| - No higher education                                                | 3756 (52.9)        | 4204 (59.2)       |
| - Higher education                                                   | 2786 (39.3)        | 2894 (40.8)       |
| <i>Missing, No. (%)</i>                                              | <i>556 (7.8)</i>   |                   |
| Ethnicity, No. (%)                                                   |                    |                   |
| - European                                                           | 3897 (54.9)        | 4069 (57.3)       |
| - Cape Verdean                                                       | 294 (4.1)          | 311 (4.4)         |
| - Dutch Antillean                                                    | 242 (3.4)          | 253 (3.5)         |
| - Moroccan                                                           | 447 (6.3)          | 471 (6.6)         |
| - Turkish                                                            | 630 (8.9)          | 651 (9.2)         |
| - Surinamese                                                         | 610 (8.6)          | 643 (9.1)         |
| - Other                                                              | 665 (9.4)          | 700 (9.9)         |
| <i>Missing, No. (%)</i>                                              | <i>313 (4.4)</i>   |                   |
| Presence of anorexia, No. (%)                                        |                    |                   |
| - No                                                                 | 5254 (74.0)        | 6352 (89.5)       |
| - Yes                                                                | 244 (3.4)          | 503 (7.1)         |
| - Maybe                                                              | 114 (1.6)          | 243 (3.4)         |
| <i>Missing, No. (%)</i>                                              | <i>1486 (20.9)</i> |                   |
| Smoking during pregnancy, No. (%)                                    |                    |                   |
| - Never                                                              | 4536 (63.9)        | 5131 (72.3)       |
| - Until pregnancy was known                                          | 551 (7.8)          | 665 (9.4)         |
| - Continued                                                          | 1179 (16.6)        | 1302 (18.3)       |

|                                                             |                   |             |
|-------------------------------------------------------------|-------------------|-------------|
| <i>Missing, No. (%)</i>                                     | 832 (11.7)        |             |
| Alcohol consumption during pregnancy, No. (%)               |                   |             |
| - Never                                                     | 3001 (42.3)       | 3493 (49.2) |
| - Until pregnancy was known                                 | 863 (12.2)        | 974 (13.7)  |
| - Continued                                                 | 2315 (32.6)       | 2631 (37.1) |
| <i>Missing, No. (%)</i>                                     | 919 (12.9)        |             |
| Folic acid supplement use, No. (%)                          |                   |             |
| - No                                                        | 1515 (21.4)       | 2204 (31.0) |
| - Start in the first 10 weeks                               | 1677 (23.6)       | 2219 (31.3) |
| - Start periconceptional                                    | 2123 (29.9)       | 2675 (37.7) |
| <i>Missing, No. (%)</i>                                     | 1783 (25.1)       |             |
| Vitamin supplement use, No. (%)                             |                   |             |
| - Yes                                                       | 4128 (58.2)       | 5049 (71.1) |
| - No                                                        | 1730 (24.4)       | 2049 (28.9) |
| <i>Missing, No. (%)</i>                                     | 1240 (17.5)       |             |
| Maternal energy intake (kcal)                               | 2041 (566)        | 2039 (490)  |
| <i>Missing, No. (%)</i>                                     | 1813 (25.5)       |             |
| Maternal zinc intake (mg)                                   | 9.6 (1.7)         | 9.6 (1.6)   |
| <i>Missing, No. (%)</i>                                     | 1813 (25.5)       |             |
| Maternal iron intake (mg)                                   | 11.1 (2.1)        | 11.1 (2.1)  |
| <i>Missing, No. (%)</i>                                     | 1813 (25.5)       |             |
| Maternal calcium intake (mg)                                | 1100 (453)        | 1087 (418)  |
| <i>Missing, No. (%)</i>                                     | 1813 (25.5)       |             |
| Maternal 25(OH)D concentrations, median (95% range), nmol/L | 46.7 (7.0, 119.4) | NI          |
| Season when maternal blood sample was taken, No. (%)        |                   |             |
| - Spring                                                    | 2097 (29.5)       | NI          |
| - Summer                                                    | 1622 (22.9)       | NI          |
| - Autumn                                                    | 1702 (24.0)       | NI          |
| - Winter                                                    | 1677 (23.6)       | NI          |
| Pregnancy complications, No. (%)                            |                   |             |
| - Gestational Hypertensive disorders                        | 388 (5.5)         | 421 (5.9)   |
| - Gestational Diabetes                                      | 67 (0.9)          | 67 (0.9)    |
| <i>Missing, No. (%)</i>                                     | 422 (5.9)         |             |

---

|                                                                                |                  |              |
|--------------------------------------------------------------------------------|------------------|--------------|
| <b>Birth characteristics</b>                                                   |                  |              |
| Female sex, No. (%)                                                            | 3529 (49.7)      | 3.529 (49.7) |
| <i>Missing, No. (%)</i>                                                        | <i>1 (0.01)</i>  |              |
| Preterm birth (<37 wk of gestation), No. (%)                                   | 370 (5.2)        | NI           |
| Low birth weight (<2500 g), No. (%)                                            | 342 (4.8)        | NI           |
| Small-size for gestational age at birth (<5 <sup>th</sup> percentile), No. (%) | 355 (5.0)        | NI           |
| 25(OH)D concentration in cord blood at birth, median (95% range), nmol/L       | 27.4 (4.7, 81.4) | NI           |
| Season when cord blood sample was taken, No. (%)                               |                  |              |
| - Spring                                                                       | 1130 (26.5)      | NI           |
| - Summer                                                                       | 1164 (27.2)      | NI           |
| - Autumn                                                                       | 996 (23.4)       | NI           |
| - Winter                                                                       | 977 (22.9)       | NI           |

---

<sup>I</sup> Values are percentages for categorical variables, means (SD) for continuous variables with a normal distribution, or medians (95% range) for continuous variables with a skewed distribution.

**Supplementary Table 2. Subject characteristics according to quartiles of 25(OH)D<sup>1</sup>**

|                                                                     | Full group        | Quartile 1        | Quartile 2        | Quartile 3        | Quartile 4        |
|---------------------------------------------------------------------|-------------------|-------------------|-------------------|-------------------|-------------------|
|                                                                     | N = 7098          | N = 1774          | N = 1773          | N = 1777          | N = 1774          |
| <b>Maternal characteristics</b>                                     |                   |                   |                   |                   |                   |
| Age, mean (SD), y                                                   | 29.7 (5.2)        | 27.7 (5.5)        | 29.6 (5.4)        | 30.5 (4.8)        | 31.3 (4.4)        |
| Body mass index at enrolment, median (95% range), kg/m <sup>2</sup> | 23.7 (18.7, 36.3) | 25.0 (18.5, 38.3) | 24.0 (18.5, 36.0) | 23.6 (18.8, 35.8) | 23.0 (18.7, 33.4) |
| Gestational age at enrollment, median (95% range), wk               | 13.9 (9.9, 22.9)  | 15.2 (10.3, 23.5) | 13.9 (9.8, 22.7)  | 13.4 (9.8, 22.1)  | 13.2 (9.5, 21.9)  |
| Nulliparous, No. (%)                                                | 3987 (56.2)       | 829 (46.8)        | 960 (54.1)        | 1085 (61.1)       | 1113 (62.7)       |
| Education level, No. (%)                                            |                   |                   |                   |                   |                   |
| - No higher education                                               | 4204 (59.2)       | 1499 (84.5)       | 1110 (62.0)       | 879 (49.5)        | 726 (40.9)        |
| - Higher education                                                  | 2894 (40.8)       | 275 (15.5)        | 673 (28.0)        | 898 (50.5)        | 1048 (59.1)       |
| Ethnicity, No. (%)                                                  |                   |                   |                   |                   |                   |
| - European                                                          | 4069 (57.3)       | 327 (18.5)        | 940 (53.0)        | 1259 (71)         | 1543 (87)         |
| - Cape Verdean                                                      | 311 (4.4)         | 105 (5.9)         | 126 (7.1)         | 62 (3.4)          | 18 (1.1)          |
| - Dutch Antillean                                                   | 253 (3.5)         | 106 (5.9)         | 88 (4.9)          | 37 (2.1)          | 22 (1.2)          |
| - Moroccan                                                          | 471 (6.6)         | 331 (18.5)        | 87 (4.9)          | 40 (2.2)          | 13 (0.7)          |
| - Turkish                                                           | 651 (9.2)         | 379 (21.5)        | 148 (8.5)         | 98 (5.6)          | 26 (1.5)          |
| - Surinamese                                                        | 643 (9.1)         | 321 (18.1)        | 201 (11.3)        | 92 (5.2)          | 29 (1.6)          |
| - Other                                                             | 700 (9.9)         | 205 (11.6)        | 183 (10.3)        | 189 (10.6)        | 123 (6.9)         |
| Presence of anorexia, No. (%)                                       |                   |                   |                   |                   |                   |
| - No                                                                | 6352 (89.5)       | 1522 (85.8)       | 1578 (89.0)       | 1630 (91.7)       | 1620 (91.3)       |
| - Yes                                                               | 503 (7.1)         | 142 (8.0)         | 130 (7.3)         | 111 (6.2)         | 120 (6.8)         |
| - Maybe                                                             | 243 (3.4)         | 110 (6.2)         | 64 (3.6)          | 36 (2.1)          | 34 (1.9)          |
| Smoking during pregnancy, No. (%)                                   |                   |                   |                   |                   |                   |

|                                                             |                   |                  |                   |                   |                    |
|-------------------------------------------------------------|-------------------|------------------|-------------------|-------------------|--------------------|
| - Never                                                     | 5.131 (72.3)      | 1226 (69.0)      | 1243 (70.0)       | 1318 (74.2)       | 1344 (75.8)        |
| - Until pregnancy was known                                 | 665 (9.4)         | 145 (8.2)        | 182 (10.3)        | 171 (9.6)         | 169 (9.5)          |
| - Continued                                                 | 1302 (18.3)       | 403 (22.8)       | 348 (19.7)        | 288 (16.2)        | 261 (14.7)         |
| Alcohol consumption during pregnancy, No. (%)               |                   |                  |                   |                   |                    |
| - Never                                                     | 3.493 (49.2)      | 1.297 (73.1)     | 899 (50.7)        | 725 (40.8)        | 571 (32.2)         |
| - Until pregnancy was known                                 | 974 (13.7)        | 164 (9.2)        | 254 (14.3)        | 266 (15.0)        | 291 (16.4)         |
| - Continued                                                 | 2.631 (37.1)      | 313 (17.6)       | 620 (35.0)        | 786 (44.2)        | 912 (51.4)         |
| Folic acid supplement use, No. (%)                          |                   |                  |                   |                   |                    |
| - No                                                        | 2204 (31.0)       | 1092 (61.6)      | 633 (35.7)        | 310 (17.4)        | 169 (9.5)          |
| - Start in the first 10 weeks                               | 2219 (31.3)       | 415 (23.4)       | 591 (33.3)        | 622 (35.0)        | 591 (33.3)         |
| - Start periconceptional                                    | 2675 (37.7)       | 267 (15.0)       | 549 (31.0)        | 845 (47.6)        | 1014 (57.2)        |
| Vitamin supplement use, No. (%)                             |                   |                  |                   |                   |                    |
| - Yes                                                       | 5049 (71.1)       | 1578 (89.0)      | 1353 (76.3)       | 1131 (63.6)       | 987 (55.6)         |
| - No                                                        | 2049 (28.9)       | 196 (11.0)       | 420 (23.7)        | 646 (36.4)        | 787 (44.4)         |
| Maternal energy intake (kcal)                               | 2039 (490)        | 1954 (484)       | 2022 (490)        | 2081 (499)        | 2102 (472)         |
| Maternal zink intake (mg)                                   | 9.6 (1.6)         | 9.1 (1.6)        | 9.5 (1.6)         | 9.7 (1.7)         | 9.8 (1.6)          |
| Maternal iron intake (mg)                                   | 11.1 (2.1)        | 10.4 (1.9)       | 11.0 (2.1)        | 11.3 (2.1)        | 11.6 (2.1)         |
| Maternal calcium intake (mg)                                | 1087 (418)        | 966 (405)        | 1060 (408)        | 1144 (426)        | 1176 (400)         |
| Maternal 25(OH)D concentrations, median (95% range), nmol/L | 46.7 (7.0, 119.4) | 14.7 (4.7, 23.6) | 35.1 (24.6, 46.0) | 59.0 (47.1, 73.0) | 91.7 (74.5, 136.8) |
| Season when maternal blood sample was take, No. (%)         |                   |                  |                   |                   |                    |
| - Spring                                                    | 2.097 (29.5)      | 565 (31.8)       | 570 (32.2)        | 530 (29.8)        | 432 (24.4)         |
| - Summer                                                    | 1622 (22.9)       | 179 (10.1)       | 307 (17.3)        | 418 (23.5)        | 718 (40.4)         |
| - Autumn                                                    | 1702 (24.0)       | 434 (24.5)       | 428 (24.1)        | 454 (25.5)        | 386 (21.8)         |

|                                                                                |                  |                  |                  |                  |                   |
|--------------------------------------------------------------------------------|------------------|------------------|------------------|------------------|-------------------|
| - Winter                                                                       | 1677 (23.6)      | 596 (33.6)       | 468 (26.4)       | 375 (21.2)       | 238 (13.4)        |
| Pregnancy complications, No. (%)                                               |                  |                  |                  |                  |                   |
| - Gestational Hypertensive disorders                                           | 421 (5.9)        | 91 (5.1)         | 103 (5.8)        | 122 (6.9)        | 105 (5.9)         |
| - Gestational Diabetes                                                         | 67 (0.9)         | 22 (1.2)         | 22 (1.2)         | 11 (0.6)         | 12 (0.7)          |
| <b>Birth characteristics</b>                                                   |                  |                  |                  |                  |                   |
| Female sex, No. (%)                                                            | 3529 (49.7)      | 882 (49.7)       | 884 (49.9)       | 898 (50.5)       | 865 (48.8)        |
| Preterm birth (<37 wk of gestation), No. (%)                                   | 370 (5.2)        | 114 (6.4)        | 103 (5.8)        | 88 (5.0)         | 65 (3.7)          |
| Low birth weight (<2500 g), No. (%)                                            | 342 (4.8)        | 109 (6.1)        | 91 (5.1)         | 78 (4.4)         | 64 (3.6)          |
| Small-size for gestational age at birth (<5 <sup>th</sup> percentile), No. (%) | 355 (5.0)        | 115 (6.5)        | 102 (5.8)        | 83 (4.7)         | 55 (3.1)          |
| 25(OH)D concentration in cord blood at birth, median (95% range), nmol/L       | 27.4 (4.7, 81.4) | 11.2 (3.0, 52.8) | 23.0 (6.0, 70.3) | 32.7 (9.0, 81.0) | 45.0 (14.3, 93.4) |
| Season when cord blood sample was taken, No. (%)                               | 4264             | 1003             | 1066             | 1119             | 1076              |
| - Spring                                                                       | 1130 (26.5)      | 329 (32.8)       | 306 (28.7)       | 296 (26.4)       | 199 (18.5)        |
| - Summer                                                                       | 1164 (27.2)      | 376 (37.5)       | 327 (30.7)       | 271 (24.2)       | 187 (17.4)        |
| - Autumn                                                                       | 996 (23.4)       | 152 (15.2)       | 234 (22.0)       | 286 (25.6)       | 324 (30.1)        |
| - Winter                                                                       | 977 (22.9)       | 146 (14.5)       | 199 (18.6)       | 266 (23.8)       | 366 (34.0)        |

<sup>†</sup>Values are percentages for categorical variables, means (SD) for continuous variables with a normal distribution, or medians (95% range) for continuous variables with a skewed distribution.

**Supplementary Table 3. Associations of maternal second trimester 25(OH)D concentrations with fetal growth patterns from multiple regression models (N = 7098)<sup>1</sup>**

|                               | Head circumference SDS<br>(95% Confidence Interval) |                                       |                                                       |
|-------------------------------|-----------------------------------------------------|---------------------------------------|-------------------------------------------------------|
|                               | 2 <sup>nd</sup> trimester<br>N = 6967               | 3 <sup>rd</sup> trimester<br>N = 6800 | Birth<br>N = 3681                                     |
| <b>25(OH)D concentrations</b> |                                                     |                                       |                                                       |
| Quartile 1 (N = 1774)         | -0.01 (-0.10, 0.08)<br>N = 1734                     | -0.07 (-0.15, 0.02)<br>N = 1633       | <b>-0.14 (-0.28, -0.01)<sup>2</sup></b><br>N = 919    |
| Quartile 2 (N = 1773)         | -0.05 (-0.12, 0.03)<br>N = 1736                     | -0.03 (-0.10, 0.05)<br>N = 1692       | -0.07 (-0.19, 0.04)<br>N = 940                        |
| Quartile 3 (N = 1777)         | 0.01 (-0.06, 0.08)<br>N = 1750                      | 0 (-0.07, 0.07)<br>N = 1722           | -0.03 (-0.13, 0.07)<br>N = 983                        |
| Quartile 4 (N = 1774)         | <i>Reference</i>                                    | <i>Reference</i>                      | <i>Reference</i>                                      |
| <i>Continuously (per SD)</i>  | <i>0.01 (-0.02, 0.04)</i>                           | <i>0.02 (-0.01, 0.05)</i>             | <b><i>0.05 (0.01, 0.10)<sup>2</sup></i></b>           |
|                               | Length SDS<br>(95% Confidence Interval)             |                                       |                                                       |
|                               | 2 <sup>nd</sup> trimester<br>N = 6988               | 3 <sup>rd</sup> trimester<br>N = 6851 | Birth<br>N = 4533                                     |
| Quartile 1 (N = 1774)         | -0.01 (-0.10, 0.08)<br>N = 1741                     | 0.01 (-0.08, 0.10)<br>N = 1674        | <b>-0.20 (-0.33, -0.07)<sup>2,3</sup></b><br>N = 1038 |
| Quartile 2 (N = 1773)         | -0.01 (-0.08, 0.07)<br>N = 1745                     | 0.04 (-0.04, 0.11)<br>N = 1705        | -0.09 (-0.19, 0.02)<br>N = 1119                       |
| Quartile 3 (N = 1777)         | 0.01 (-0.06, 0.08)<br>N = 1751                      | 0.05 (-0.02, 0.12)<br>N = 1732        | -0.09 (-0.18, 0.01)<br>N = 1164                       |
| Quartile 4 (N = 1774)         | <i>Reference</i>                                    | <i>Reference</i>                      | <i>Reference</i>                                      |
| <i>Continuously (per SD)</i>  | <i>0.01 (-0.02, 0.04)</i>                           | <i>-0.01 (-0.04, 0.02)</i>            | <b><i>0.06 (0.02, 0.11)<sup>2,3</sup></i></b>         |
|                               | Weight SDS<br>(95% Confidence Interval)             |                                       |                                                       |
|                               | 2 <sup>nd</sup> trimester<br>N = 6952               | 3 <sup>rd</sup> trimester<br>N = 6828 | Birth<br>N = 7043                                     |
| Quartile 1 (N = 1774)         | -0.07 (-0.15, 0.02)<br>N = 1737                     | -0.04 (-0.13, 0.05)<br>N = 1666       | <b>-0.17 (-0.26, -0.09)<sup>2,3</sup></b><br>N = 1751 |
| Quartile 2 (N = 1773)         | -0.02 (-0.09, 0.06)<br>N = 1731                     | 0.02 (-0.06, 0.09)<br>N = 1701        | <b>-0.07 (-0.14, -0.01)<sup>2</sup></b><br>N = 1759   |
| Quartile 3 (N = 1777)         | -0.01 (-0.07, 0.06)<br>N = 1742                     | 0.07 (-0.01, 0.13)<br>N = 1728        | -0.02 (-0.09, 0.05)<br>N = 1766                       |
| Quartile 4 (N = 1774)         | <i>Reference</i>                                    | <i>Reference</i>                      | <i>Reference</i>                                      |
| <i>Continuously (per SD)</i>  | <i>0.02 (-0.01, 0.06)</i>                           | <i>0.01 (-0.02, 0.04)</i>             | <b><i>0.06 (0.03, 0.09)<sup>2,3</sup></i></b>         |

<sup>1</sup>Values are linear regression coefficients (95% confidence interval) and reflect the differences in fetal growth compared to the reference group. Continuous analyses reflect the differences in head circumference, femur length, estimated fetal weight during second and third trimester of pregnancy and head circumference, length and weight at birth per 1 SDS increase in maternal 25(OH)D. Multivariable model is adjusted for maternal characteristics (age, body mass index at intake, alcohol consumption, smoking during pregnancy, vitamin supplements, folic acid, iron, calcium, zinc and energy intake during pregnancy, education, ethnicity, gestational hypertensive disorders, gestational diabetes, parity and season when blood samples were drawn, and the presence of anorexia). <sup>2</sup> *P* value < 0.05. Abbreviations: SDS standard deviation scores. <sup>3</sup>Also significant after applying Bonferroni correction (*P* value < 0.025).

**Supplementary Table 4. Associations of maternal second trimester 25(OH)D concentrations in clinical cut-off groups with fetal growth patterns (N = 7098)<sup>1</sup>**

|                                | Head circumference SDS<br>(95% Confidence Interval) |                                       |                                               |
|--------------------------------|-----------------------------------------------------|---------------------------------------|-----------------------------------------------|
|                                | 2 <sup>nd</sup> trimester<br>N = 6967               | 3 <sup>rd</sup> trimester<br>N = 6800 | Birth<br>N = 3681                             |
| <b>25(OH)D concentrations</b>  |                                                     |                                       |                                               |
| < 25.0 nmol/L (N = 1828)       | -0.02 (-0.11, 0.07)                                 | -0.07 (-0.16, 0.02)                   | <b>-0.13 (-0.27, 0)</b>                       |
| 25.0 to 49.9 nmol/L (N = 1893) | -0.03 (-0.11, 0.04)                                 | -0.02 (-0.09, 0.05)                   | -0.08 (-0.19, 0.03)                           |
| 50.0 to 74.9 nmol/L (N = 1604) | 0.01 (-0.06, 0.08)                                  | -0.01 (-0.08, 0.06)                   | -0.04 (-0.14, 0.07)                           |
| ≥ 75.0 nmol/L (N = 1693)       | <i>Reference</i>                                    | <i>Reference</i>                      | <i>Reference</i>                              |
| <i>Continuously (per SD)</i>   | <i>0.01 (-0.02, 0.04)</i>                           | <i>0.02 (-0.01, 0.05)</i>             | <b><i>0.05 (0.01, 0.10)<sup>2,3</sup></i></b> |
|                                | Length SDS<br>(95% Confidence Interval)             |                                       |                                               |
|                                | 2 <sup>nd</sup> trimester<br>N = 6988               | 3 <sup>rd</sup> trimester<br>N = 6851 | Birth<br>N = 4533                             |
| < 25.0 nmol/L (N = 1828)       | -0.01 (-0.09, 0.08)                                 | 0.02 (-0.07, 0.11)                    | <b>-0.18 (-0.30, -0.05)<sup>2,3</sup></b>     |
| 25.0 to 49.9 nmol/L (N = 1893) | -0.01 (-0.09, 0.06)                                 | 0.04 (-0.04, 0.11)                    | -0.08 (-0.19, 0.02)                           |
| 50.0 to 74.9 nmol/L (N = 1604) | 0 (-0.07, 0.07)                                     | 0.06 (-0.01, 0.12)                    | -0.08 (-0.18, 0.02)                           |
| ≥ 75.0 nmol/L (N = 1693)       | <i>Reference</i>                                    | <i>Reference</i>                      | <i>Reference</i>                              |
| <i>Continuously (per SD)</i>   | <i>0.01 (-0.02, 0.04)</i>                           | <i>-0.01 (-0.04, 0.02)</i>            | <b><i>0.06 (0.02, 0.11)<sup>2,3</sup></i></b> |
|                                | Weight SDS<br>(95% Confidence Interval)             |                                       |                                               |
|                                | 2 <sup>nd</sup> trimester<br>N = 6952               | 3 <sup>rd</sup> trimester<br>N = 6828 | Birth<br>N = 7043                             |
| < 25.0 nmol/L (N = 1828)       | -0.07 (-0.16, 0.01)                                 | -0.06 (-0.15, 0.03)                   | <b>-0.16 (-0.25, -0.08)<sup>2,3</sup></b>     |
| 25.0 to 49.9 nmol/L (N = 1893) | -0.03 (-0.10, 0.05)                                 | 0.02 (-0.06, 0.09)                    | <b>-0.07 (-0.14, 0)</b>                       |
| 50.0 to 74.9 nmol/L (N = 1604) | -0.01 (-0.08, 0.06)                                 | 0.05 (-0.02, 0.12)                    | -0.05 (-0.11, 0.02)                           |
| ≥ 75.0 nmol/L (N = 1693)       | <i>Reference</i>                                    | <i>Reference</i>                      | <i>Reference</i>                              |
| <i>Continuously (per SD)</i>   | <i>0.02 (-0.01, 0.06)</i>                           | <i>0.01 (-0.02, 0.04)</i>             | <b><i>0.06 (0.03, 0.09)<sup>2,3</sup></i></b> |

<sup>1</sup>Values are linear regression coefficients (95% confidence interval) and reflect the differences in fetal growth compared to the reference group. Continuous analyses reflect the differences in head circumference, femur length, estimated fetal weight during second and third trimester of pregnancy and head circumference, length and weight at birth per 1 SDS increase in maternal 25(OH)D. Multivariable model is adjusted for maternal characteristics (age, body mass index at intake, alcohol consumption, smoking during pregnancy, folic acid and vitamin supplements, energy, iron, calcium and zinc dietary intake during pregnancy, education, ethnicity, gestational hypertensive disorders, gestational diabetes, parity and the presence of anorexia and season when blood samples were drawn). <sup>2</sup>*P value* < 0.05. Abbreviations: SDS standard deviation scores. <sup>3</sup>Also significant after applying Bonferroni correction (*P value* < 0.025).

**Supplementary Table 5. Associations of maternal second trimester 25(OH)D concentrations with fetal growth outcomes among Europeans only (N = 4069) <sup>1</sup>**

|                               | Head circumference SDS<br>(95% Confidence Interval) |                                       |                                               |
|-------------------------------|-----------------------------------------------------|---------------------------------------|-----------------------------------------------|
|                               | 2 <sup>nd</sup> trimester<br>N = 4014               | 3 <sup>rd</sup> trimester<br>N = 3929 | Birth<br>N = 2298                             |
| <b>25(OH)D concentrations</b> |                                                     |                                       |                                               |
| Quartile 1 (N = 328)          | -0.06 (-0.20, 0.08)                                 | -0.01 (-0.14, 0.13)                   | -0.16 (-0.38, 0.06)                           |
| Quartile 2 (N = 940)          | -0.01 (-0.10, 0.08)                                 | 0.01 (-0.08, 0.09)                    | -0.04 (-0.17, 0.09)                           |
| Quartile 3 (N = 1260)         | 0.02 (-0.06, 0.10)                                  | -0.02 (-0.09, 0.06)                   | -0.01 (-0.12, 0.01)                           |
| Quartile 4 (N = 1543)         | <i>Reference</i>                                    | <i>Reference</i>                      | <i>Reference</i>                              |
| <i>Continuously (per SD)</i>  | <i>0.01 (-0.03, 0.05)</i>                           | <i>0.01 (-0.03, 0.05)</i>             | <i>0.04 (-0.01, 0.10)</i>                     |
|                               | Length SDS<br>(95% Confidence Interval)             |                                       |                                               |
|                               | 2 <sup>nd</sup> trimester<br>N = 4017               | 3 <sup>rd</sup> trimester<br>N = 3963 | Birth<br>N = 2742                             |
| Quartile 1 (N = 328)          | -0.08 (-0.22, 0.05)                                 | -0.01 (-0.15, 0.14)                   | -0.17 (-0.37, 0.03)                           |
| Quartile 2 (N = 940)          | 0.03 (-0.06, 0.11)                                  | 0.06 (-0.02, 0.15)                    | -0.08 (-0.21, 0.04)                           |
| Quartile 3 (N = 1260)         | 0.03 (-0.05, 0.10)                                  | 0.05 (-0.03, 0.13)                    | -0.09 (-0.19, 0.02)                           |
| Quartile 4 (N = 1543)         | <i>Reference</i>                                    | <i>Reference</i>                      | <i>Reference</i>                              |
| <i>Continuously (per SD)</i>  | <i>0.01 (-0.03, 0.04)</i>                           | <i>-0.02 (-0.06, 0.02)</i>            | <i><b>0.06 (0.01, 0.11)</b><sup>2</sup></i>   |
|                               | Weight SDS<br>(95% Confidence Interval)             |                                       |                                               |
|                               | 2 <sup>nd</sup> trimester<br>N = 3995               | 3 <sup>rd</sup> trimester<br>N = 3949 | Birth<br>N = 4047                             |
| Quartile 1 (N = 328)          | <b>-0.14 (-0.28, -0.01)*</b>                        | -0.08 (-0.22, 0.06)                   | <b>-0.17 (-0.32, -0.03)<sup>2,3</sup></b>     |
| Quartile 2 (N = 940)          | 0.04 (-0.05, 0.13)                                  | 0.05 (-0.04, 0.14)                    | -0.06 (-0.14, 0.03)                           |
| Quartile 3 (N = 1260)         | 0.02 (-0.06, 0.10)                                  | 0.06 (-0.01, 0.14)                    | -0.04 (-0.11, 0.04)                           |
| Quartile 4 (N = 1543)         | <i>Reference</i>                                    | <i>Reference</i>                      | <i>Reference</i>                              |
| <i>Continuously (per SD)</i>  | <i>0.01 (-0.03, 0.05)</i>                           | <i>0 (-0.04, 0.04)</i>                | <i><b>0.05 (0.01, 0.10)<sup>2,3</sup></b></i> |

<sup>1</sup>Values are linear regression coefficients (95% confidence interval) and reflect the differences in fetal growth measures compared to the reference group. Continuous analyses reflect the differences in head circumference, femur length, estimated fetal weight during second and third trimester of pregnancy and head circumference, length and weight at birth per 1 SDS increase in maternal 25(OH)D. Multivariable model is adjusted for maternal characteristics (age, body mass index at intake, alcohol consumption, smoking during pregnancy, folic acid and vitamin supplements, energy, iron, calcium and zinc dietary intake during pregnancy, education, ethnicity, gestational hypertensive disorders, gestational diabetes, parity and the presence of anorexia and season when blood samples were drawn. <sup>2</sup>*P* value < 0.05. <sup>3</sup>Also significant after applying Bonferroni correction (*P* value < 0.025). Abbreviations: SDS standard deviation scores.

**Supplementary Figure 2. Associations of maternal second trimester 25(OH)D concentrations, in cut-off groups with the risks of adverse birth outcomes (N= 7098)<sup>1</sup>**

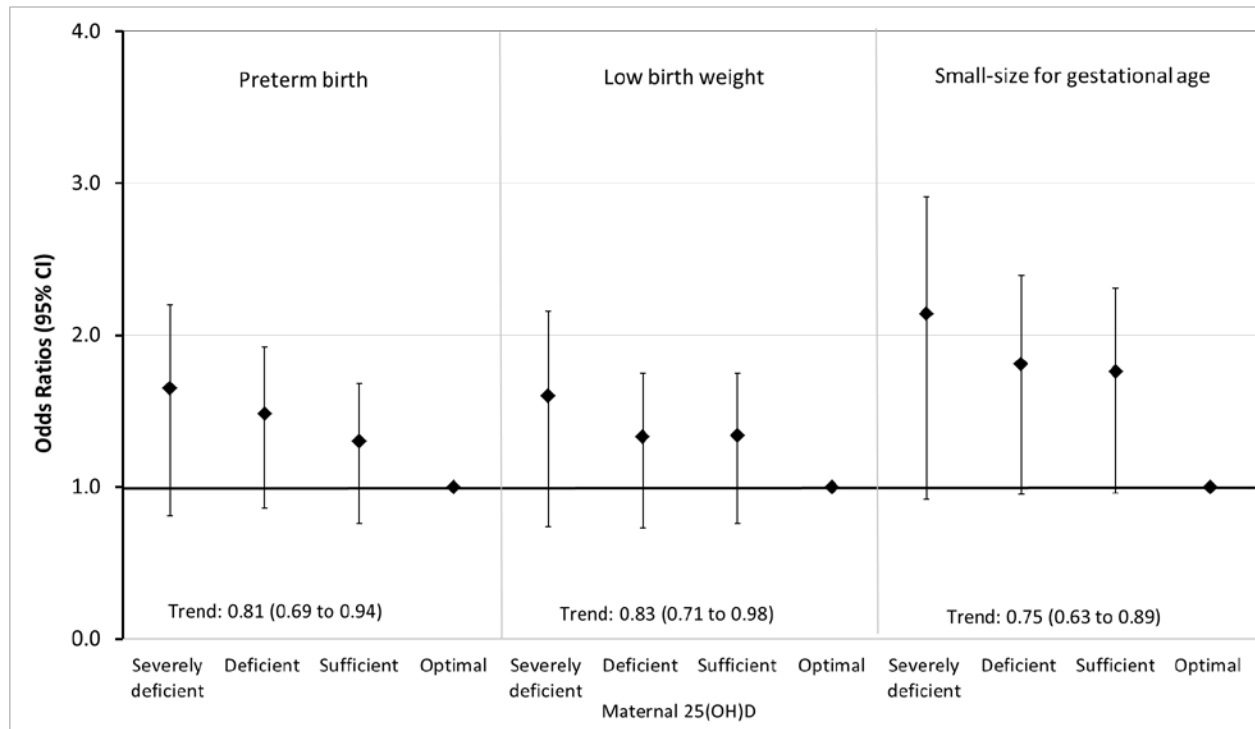

<sup>1</sup>Values are logistic regression coefficients (95% confidence interval) and reflect the risk of adverse birth outcomes compared to the reference group. Continuous analyses reflect the risks of being preterm, having a low birth weight or being small-size for gestational age at birth per 1 SDS increase in maternal 25(OH)D. Multivariable model is adjusted for maternal characteristics (age, body mass index at intake, alcohol consumption, smoking during pregnancy, folic acid and vitamin supplements, energy, iron, calcium and zinc dietary intake during pregnancy, education, ethnicity, gestational hypertensive disorders, gestational diabetes, parity and the presence of anorexia and season when blood samples were drawn).

**Supplementary Figure 3. Associations of maternal second trimester 25(OH) concentrations with the risks of adverse birth outcomes among Europeans only (N = 4069) <sup>1</sup>**

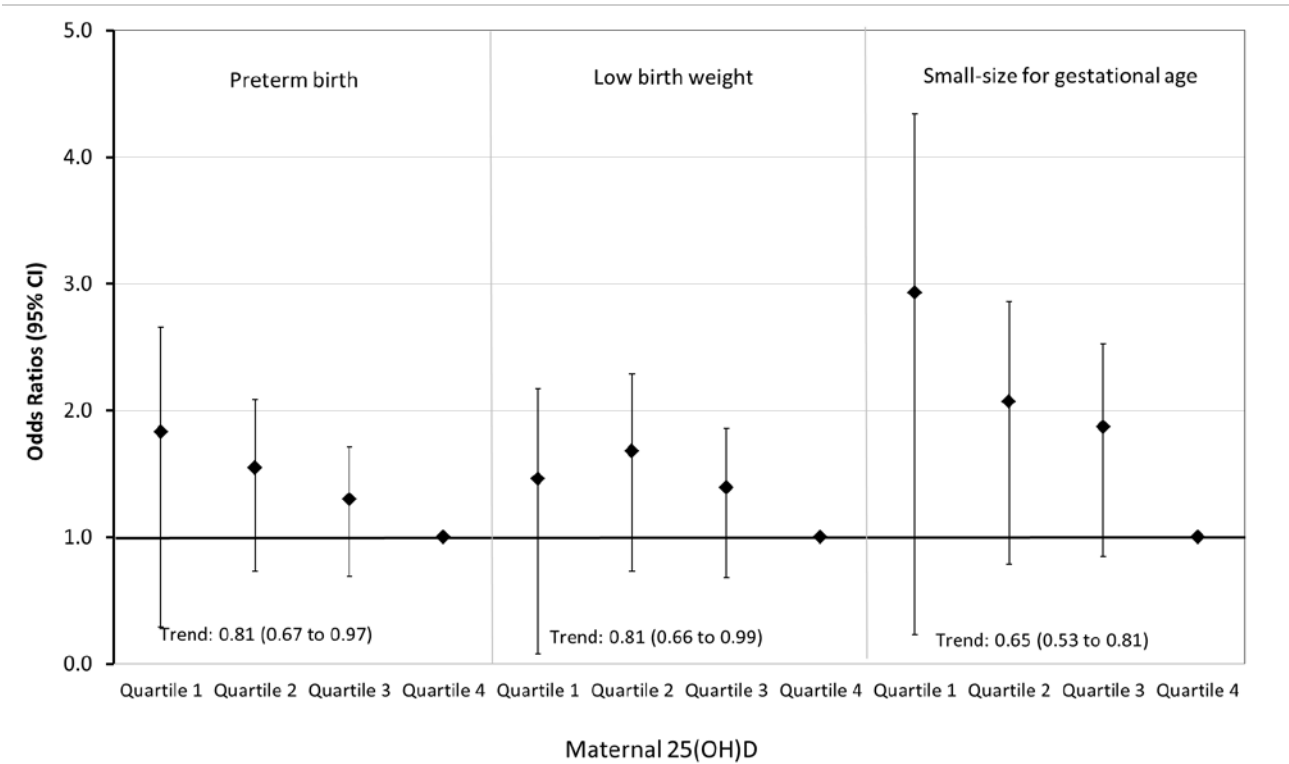

<sup>1</sup>Values are logistic regression coefficients (95% confidence interval) and reflect the risks of adverse birth outcomes compared to the reference group. Continuous analyses reflect the risk of being preterm, having a low birth weight or being small-size for gestational age at birth per 1 SDS increase in maternal 25(OH)D. Multivariable model is adjusted for maternal characteristics (age, body mass index at intake, alcohol consumption, smoking during pregnancy, folic acid and vitamin supplements, energy, iron, calcium and zinc dietary intake during pregnancy, education, ethnicity, gestational hypertensive disorders, gestational diabetes, parity, the presence of anorexia and season when blood samples were drawn).

**Supplementary Table 6. Associations of adverse birth outcomes with cord blood 25(OH)D concentrations among Europeans only (N = 2550)<sup>1</sup>**

| Birth characteristics                   | N           | Cord blood 25(OH)D<br>nmol/L |
|-----------------------------------------|-------------|------------------------------|
| <b>Gestational age</b>                  | <b>2553</b> |                              |
| <37.0 weeks                             | 73          | 0.03 (-0.25, 0.32)           |
| 37.0-41.9 weeks                         | 2302        | Reference                    |
| ≥42 weeks                               | 178         | -0.17 (-0.34, 0.01)          |
| <i>Trend</i>                            |             | <i>-0.03 (-0.06, 0.01)</i>   |
| <b>Birth weight</b>                     | <b>2552</b> |                              |
| <2000 grams                             | 9           | -0.60 (-1.46, 0.26)          |
| 2000 - 2499 g                           | 45          | 0.22 (-0.12, 0.57)           |
| 2500 - 2999 g                           | 318         | -0.10 (-0.26, 0.05)          |
| 3000 - 3499 g                           | 864         | Reference                    |
| 3500 - 3999 g                           | 893         | -0.02 (-0.13, 0.09)          |
| 4000 - 4499 g                           | 354         | -0.04 (-0.18, 0.10)          |
| ≥4500 grams                             | 69          | -0.09 (-0.38, 0.19)          |
| <i>Trend</i>                            |             | <i>0.03 (-0.02, 0.09)</i>    |
| <b>Birth weight for gestational age</b> | <b>2553</b> |                              |
| Small                                   | 79          | -0.23 (-0.49, 0.04)          |
| Normal                                  | 2,313       | Reference                    |
| Large                                   | 161         | -0.04 (-0.23, 0.15)          |
| <i>Trend</i>                            |             | <i>0.03 (-0.02, 0.07)</i>    |

<sup>1</sup>Values are linear regression coefficients (95% confidence interval) and reflect the change in standard deviation (SDS) of cord blood 25(OH)D for each birth weight or gestational age group, compared to the reference group. Trend estimates represent the effect estimates for the continuous associations per SDS change in birth characteristic. Multivariable model is adjusted for fetal sex, maternal characteristics (age, body mass index at intake, alcohol consumption, smoking during pregnancy, folic acid and vitamin supplements, energy, iron, calcium and zinc dietary intake during pregnancy, education, ethnicity, gestational hypertensive disorders, gestational diabetes, parity and the presence of anorexia).
